# Supplementary material for: Modeling cancer metastasis using acoustically bio-printed patient-derived 3D tumor microtissues
Source: Royal Society of Chemistry journal article supplement (doi:10.1039/d1tb02789a), 2022-01-01
Supplement: d1tb02789a1.pdf [file d1tb02789a1.pdf]

## Supplementary Information

# Model Cancer Metastasis using Acoustically Bio-printed Patient-Derived 3D Tumor Microtissues

Hui Chen,<sup>a</sup> Liang Du,<sup>a</sup> Juan Li,<sup>a</sup> Zhuhao Wu,<sup>a</sup> Zhiyi Gong,<sup>a</sup> Yu Xia,<sup>a</sup> Zhou Fan,<sup>c</sup> Qun Qian,<sup>c</sup> Zhao Ding,<sup>c</sup> Hang Hu,<sup>\*c</sup> and Shishang Guo,<sup>\*ab</sup>

<sup>a</sup>Key Laboratory of Artificial Micro- and Nano-structures of Ministry of Education, School of Physics and Technology, Wuhan University, Wuhan 430072, China

E-mail: [gssyhx@whu.edu.cn](mailto:gssyhx@whu.edu.cn)

<sup>b</sup>Hubei Yangtze Memory Laboratories, Wuhan 430205, China

E-mail: [gssyhx@whu.edu.cn](mailto:gssyhx@whu.edu.cn)

<sup>c</sup>Department of Colorectal and Anal Surgery, Hubei Key Laboratory of Intestinal and Colorectal Diseases, Zhongnan Hospital of Wuhan University, Wuhan 430072, China

E-mail: [minihh0827@126.com](mailto:minihh0827@126.com)

\*Correspondence and requests for materials should be addressed to H.H., or S.S.G. (Electronic mail: [minihh0827@126.com](mailto:minihh0827@126.com), [gssyhx@whu.edu.cn](mailto:gssyhx@whu.edu.cn))

## **Solutions**

**1x Penicillin/Streptomycin in PBS:** (1X PBS / 1x Penicillin/Streptomycin) 1ml 100x Penicillin/Streptomycin was added to 100ml 1X PBS and mix well.

**1% BSA solution:** (1X PBS / 1% BSA) 5.0g of bovine serum protein was added to 500ml of 1X PBS, mixed evenly, and then filtered through a 0.22um filter to obtain the 1% BSA solution.

**Blocking buffer:** (1X PBS / 5% regular serum / 0.3% Triton™ X-100) To prepare 10 ml, add 0.5 ml of normal goat serum and 30 µl of Triton™ X-100 to 9 ml of 1X PBS and mix well.

**Antibody dilution buffer:** (1X PBS / 1% BSA / 0.3% Triton™ X-100) To prepare 10 ml, add 30 ul Triton™ X-100 to 9.70 ml 1% BSA solution.

**Tissue digestive enzymes:** (4.7ml RPMI / 200ul enzyme H / 100ul enzyme R / 25ul enzyme A) The corresponding amount of enzyme were added to serum-free medium RPMI, mix the liquid with a pipette dozens of times and mix well.

### **Preparation:**

Miltenyi Human tumor dissociation kit:

Prepare Enzyme H by reconstitution of the lyophilized powder in each vial with 3 mL of RPMI 1640 or DMEM. Prepare aliquots of appropriate volume to avoid repeated freeze-thaw cycles. Store aliquots at –20 °C. This solution is stable for 6 months after reconstitution. For cell culture experiments subsequent to tissue dissociation, Enzyme H should be sterile filtered prior to aliquoting.

Prepare Enzyme R by reconstitution of the lyophilized powder in the vial with 2.7 mL RPMI 1640 or DMEM. Prepare aliquots of appropriate volume to avoid repeated freeze-thaw cycles. Store aliquots at –20°C. This solution is stable for 6 months after reconstitution. ▲Note: Make sure to thoroughly mix this suspension immediately before withdrawing the required reaction volume!

Prepare Enzyme A by reconstitution of the lyophilized powder in the vial with 1 mL of Buffer A supplied with the kit. Do not vortex. Prepare aliquots of appropriate volume to avoid repeated freeze-thaw cycles. Store aliquots at –20°C. This solution is stable for 6 months after reconstitution.

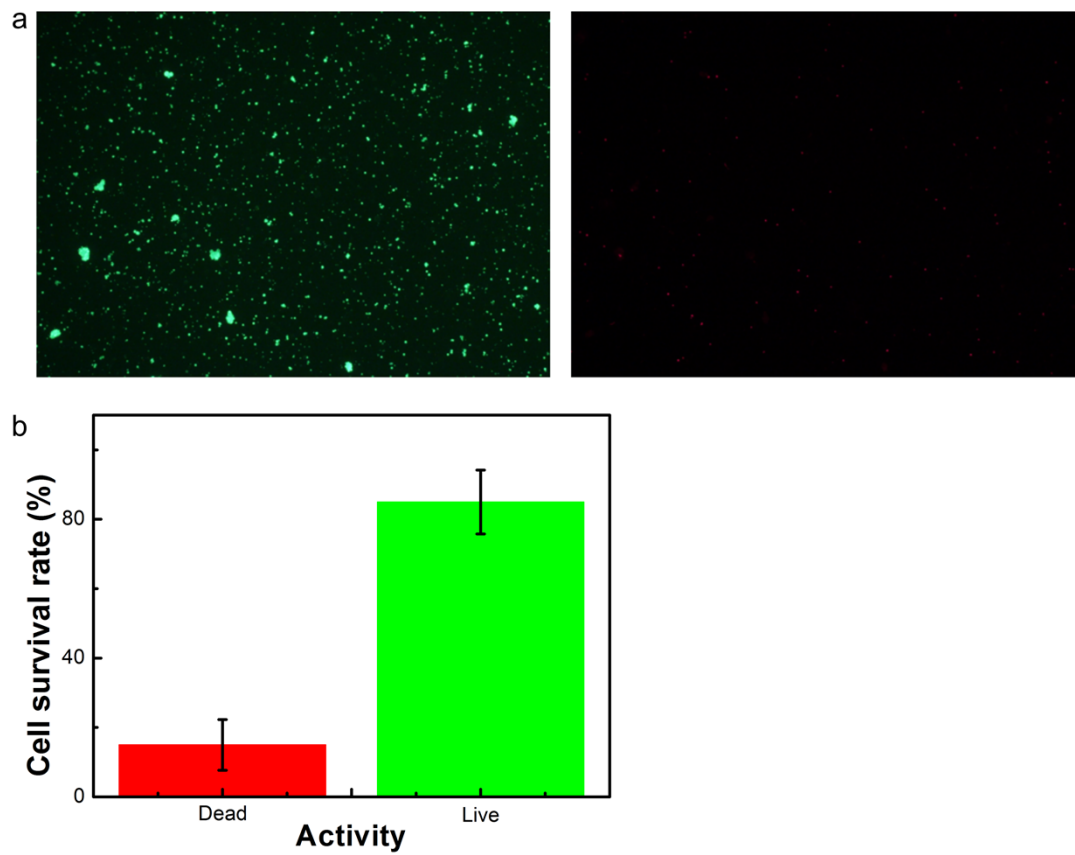

**Fig. S1** (a) Characterization of the survival rate of cells isolated from human tissues. Red means dead cells, green means live cells. (b) Quantification of cell viability.

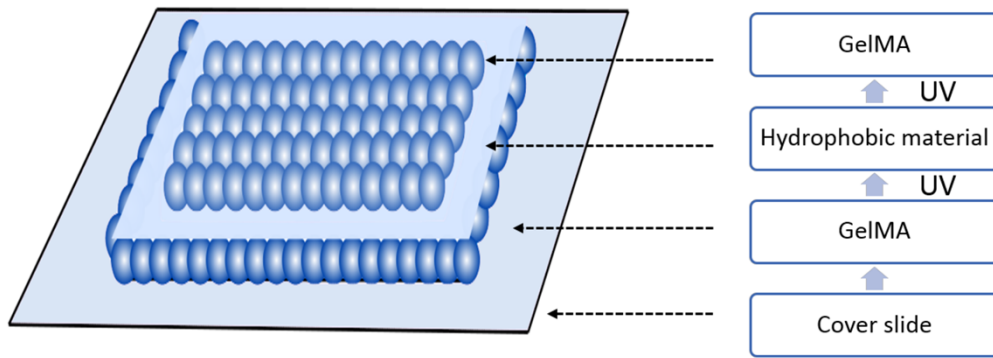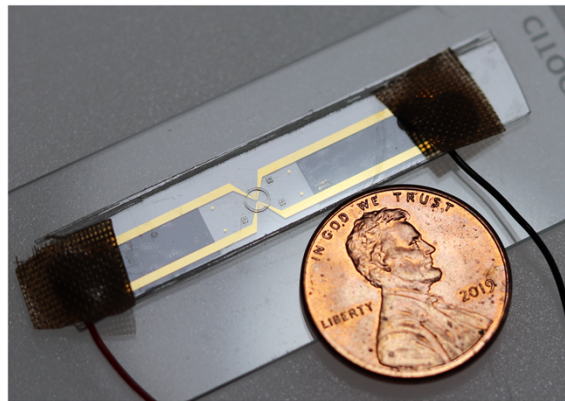

**Fig. S2** (a) Schematic diagram of the construction of a 3-dimensional model of acoustic 3D printed devices. (b) Physical image of acoustic 3D printing device.

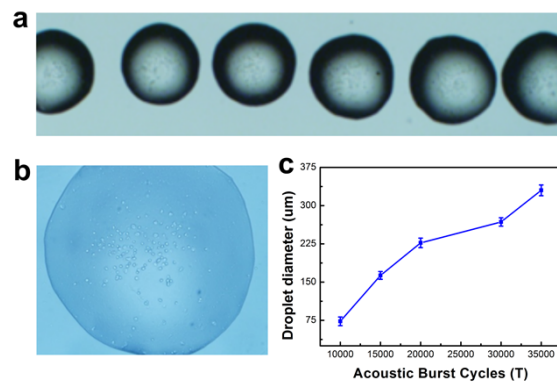

**Fig. S3** (a) Acoustic 3D printing devices perform droplet placement and (b) manipulation of cell-containing droplets. (c) the size of the acoustic droplet changes with the acoustic signal.

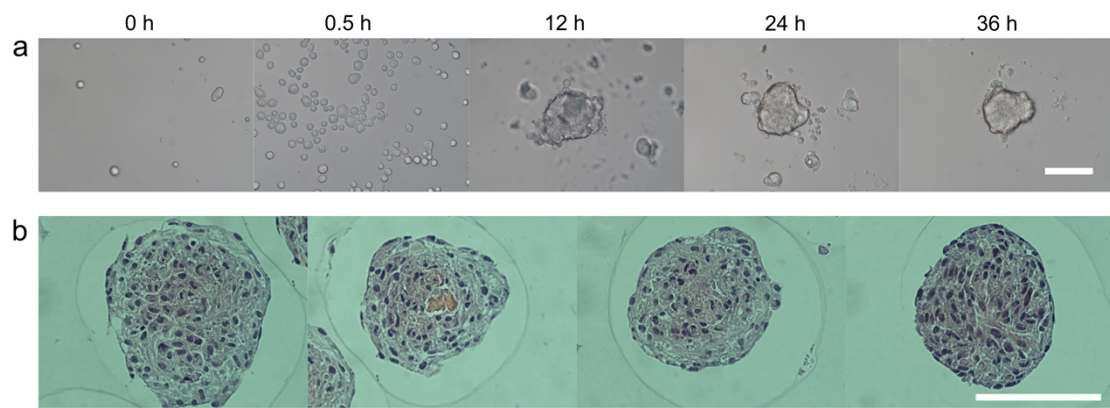

**Fig. S4** (a) The patient-derived cells were quickly cultured into tumor micro-tissues within 36 hours. (b) HE section of patient-derived tumor microtissue. The scale bar is 100um.

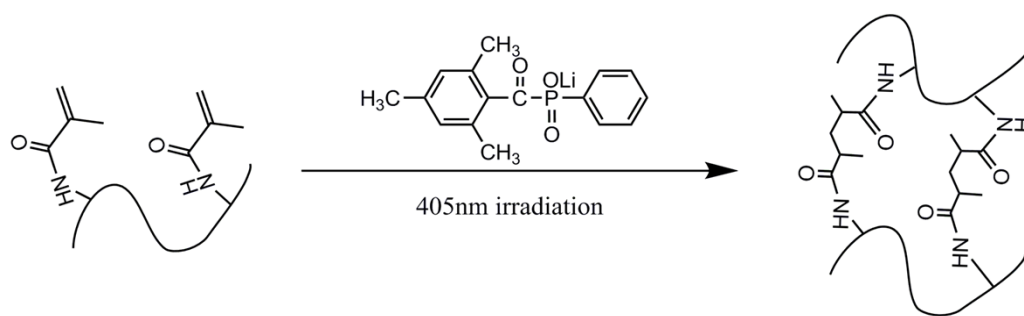

**Fig. S5** The GelMA curing process.

**Table S1.** Pulse signal parameter setting.

| <b>Amp</b> | <b>Frequency</b> | <b>Trig</b> | <b>Burst</b> | <b>Gain</b> |
|------------|------------------|-------------|--------------|-------------|
| 100-140mv  | 38.13 MHz        | 2.0s        | 25000        | <25w        |



## Reagents

**Table S2.** Reagents used in the tissue digestion and cell culture.

| <b>Reagent</b>                | <b>company</b> | <b>Cat.NO</b> | <b>Final concentration</b>                    |
|-------------------------------|----------------|---------------|-----------------------------------------------|
| Tumor Dissociation Kit, human | Miltenyi       | 130-095-929   | Instruction concentration                     |
| Primocin                      | Invivogen      | Ant-pm-1      | 50 mg·ml <sup>-1</sup>                        |
| DMEM/F-12                     | GIBCO          | C11330500BT   | 1X                                            |
| Y-27632                       | Abmole         | Y-27632       | 10 uM                                         |
| Penicillin/Streptomycin       | Invitrogen     | 15140-122     | 100U·ml <sup>-1</sup> /100mg·ml <sup>-1</sup> |
| D-PBS                         | Gibco          | 14190250      | 1X                                            |
| PBS                           | Gibco          | 10010023      | 1X                                            |
| FBS                           | Gibco          | 16140071      | 10%                                           |
| BSA                           | Sigma          | A1933-5G      | 1mg/ml                                        |
| Triton <sup>TM</sup> X-100    | Sigma          | X100          | 0.3%                                          |
| RPMI                          | Gibco          | 72400047      | 1X                                            |
| DMSO                          | Sigma          | 94563-10ml    | 10%                                           |
| Paraformaldehyde              | Sigma          | 158127        | 4%                                            |
| Trypsin                       | Gibco          | 25200056      | 0.25%                                         |

**Table S3.** The antibodies used for Immunofluorescence were listed below:

| <b>Primary antibodies</b>                                                            | <b>Company</b>             | <b>Cat.NO</b> | <b>Dilution</b> |
|--------------------------------------------------------------------------------------|----------------------------|---------------|-----------------|
| EGF Receptor (E746-A750del Specific) (D6B6) XP® Rabbit mAb#2085                      | Cell Signaling Technology  | 2085S         | 1:250           |
| CD44 (156-3C11) Mouse mAb#3570                                                       | Cell Signaling Technology  | 3570S         | 1:400           |
| CD133 (D2V8Q) XP® Rabbit mAb#64326                                                   | Cell Signaling Technology  | 64326S        | 1:400           |
| Ki67                                                                                 | ZSGB-BIO                   | ZM0166        | 1:100           |
| <b>Secondary antibodies</b>                                                          | <b>Company</b>             | <b>Cat.NO</b> | <b>Dilution</b> |
| Anti-rabbit IgG (H+L), F(ab') <sub>2</sub> Fragment (PE Conjugate)#8885              | Cell Signaling Technology, | 8885S         | 1:250           |
| Anti-mouse IgG (H+L), F(ab') <sub>2</sub> Fragment (Alexa Fluor® 488 Conjugate)#4408 | Cell Signaling Technology, | 4408S         | 1:250           |

**Table S4.** Patients' baseline characteristic.

| <b>Patient number</b> | <b>Sex</b> | <b>Age(years)</b> | <b>TNM stage</b> | <b>Tumor location</b>                                               | <b>Depth of tumor invasion</b>  | <b>Differentiation</b> | <b>Invasion ability</b>                                     |
|-----------------------|------------|-------------------|------------------|---------------------------------------------------------------------|---------------------------------|------------------------|-------------------------------------------------------------|
| P(V)1                 | male       | 69                | pT3N0<br>Mx      | sigmoid colon                                                       | Subserosal layer                | moderate               | No clear vessel and nerve invasion                          |
| P(V)2                 | female     | 59                | pT3N2b<br>Mx     | Near the junction of straight and second, the size is about 5cm×5cm | Subserosa fibrofatty tissue     | moderate               | Visible vascular tumor thrombus, no clear nerve invasion    |
| P(V)3                 | male       | 71                | pT3No<br>Mx      | Mid rectum                                                          | Serosa fibrofatty tissue        | moderate               | No clear vessel and nerve invasion                          |
| P(V)4                 | female     | 49                | pT4bN1<br>Mx     | Ascending colon                                                     | Serosal layer                   | moderate               | No clear vessel and nerve invasion                          |
| P(V)5                 | male       | 58                | ypT3N0<br>Mx     | Peritoneal reflex                                                   | Serosal layer                   | G2<br>(moderate)       | No clear vessel and nerve invasion                          |
| P(V)6                 | female     | 44                | ypT3N2<br>Mx     | Anterior peritoneal reflex                                          | Extramuscular fibrous tissue    | moderate               | Vascular infiltration: visible; nerve infiltration: visible |
| P(V)7                 | male       | 66                | pT3N2b<br>Mx     | Upper rectum                                                        | Extramuscular fibrofatty tissue | Poor                   | Vascular infiltration: visible; nerve infiltration: visible |
